# Supplementary material for: Initial Coefficients Bounds for Bi-univalent Functions Related to Gregory Coefficients
Source: Preprints.org preprint supplement (doi:10.20944/preprints202305.2115.v1), 2023-05-30
Supplement: Supplementary file 1 [file supplementary]

21 voucher(s) found

| Voucher code     | Voucher type | Voucher discount | Issued for                          | Valid from | Valid to   | Valid journal | Valid special issue | Granted at |
|------------------|--------------|------------------|-------------------------------------|------------|------------|---------------|---------------------|------------|
| 00a67977cf2bbbbc | Reviewer     | 50 CHF           | gms@vit.ac.in <sup>Associated</sup> | 2021-12-14 | 2023-12-14 | All           | -                   | 2021-12-14 |
| d2a7a8f0c7b02a1d | Reviewer     | 50 CHF           | gms@vit.ac.in <sup>Associated</sup> | 2021-12-29 | 2023-12-29 | All           | -                   | 2021-12-29 |
| 67be3537becd1719 | Reviewer     | 100 CHF          | gms@vit.ac.in <sup>Associated</sup> | 2022-02-01 | 2024-02-01 | All           | -                   | 2022-02-01 |
| 1992d65d7469663c | Reviewer     | 50 CHF           | gms@vit.ac.in <sup>Associated</sup> | 2022-03-04 | 2024-03-04 | All           | -                   | 2022-03-04 |
| c5b7a6ecc06fcc1c | Reviewer     | 100 CHF          | gms@vit.ac.in <sup>Associated</sup> | 2022-07-06 | 2024-07-06 | All           | -                   | 2022-07-06 |
| 96ac7bac18af444d | Reviewer     | 100 CHF          | gms@vit.ac.in <sup>Associated</sup> | 2022-07-27 | 2024-07-27 | All           | -                   | 2022-07-27 |
| 328bda7cc71dd362 | Reviewer     | 50 CHF           | gms@vit.ac.in <sup>Associated</sup> | 2023-02-05 | 2025-02-05 | All           | -                   | 2023-02-05 |
| 130e87e6ebcf22d3 | Reviewer     | 50 CHF           | gmsmoorthy@yahoo.com                | 2022-02-03 | 2024-02-03 | All           | -                   | 2022-02-03 |
| 7800eda9e68a1f79 | Reviewer     | 100 CHF          | gmsmoorthy@yahoo.com                | 2022-02-23 | 2024-02-23 | All           | -                   | 2022-02-23 |
| 83aca4f4e956cb2d | Reviewer     | 100 CHF          | gmsmoorthy@yahoo.com                | 2022-03-10 | 2024-03-10 | All           | -                   | 2022-03-10 |
| 91e59f0fb5f92395 | Reviewer     | 100 CHF          | gmsmoorthy@yahoo.com                | 2022-03-25 | 2024-03-25 | All           | -                   | 2022-03-25 |
| 11e0df3b10af17c7 | Reviewer     | 100 CHF          | gmsmoorthy@yahoo.com                | 2022-04-20 | 2024-04-20 | All           | -                   | 2022-04-20 |
| 708743e0f93741f6 | Reviewer     | 50 CHF           | gmsmoorthy@yahoo.com                | 2022-05-27 | 2024-05-27 | All           | -                   | 2022-05-27 |
| 105c65b662ab49d5 | Reviewer     | 100 CHF          | gmsmoorthy@yahoo.com                | 2022-06-22 | 2024-06-22 | All           | -                   | 2022-06-22 |
| b96ac294db50e285 | Reviewer     | 50 CHF           | gmsmoorthy@yahoo.com                | 2022-07-24 | 2024-07-24 | All           | -                   | 2022-07-24 |
| 2ac0f68daa112c37 | Reviewer     | 100 CHF          | gmsmoorthy@yahoo.com                | 2022-08-19 | 2024-08-19 | All           | -                   | 2022-08-19 |
| d1c37e3fb9d09e68 | Reviewer     | 50 CHF           | gmsmoorthy@yahoo.com                | 2022-10-05 | 2024-10-05 | All           | -                   | 2022-10-05 |
| ab6e2a6a3429ec1c | Reviewer     | 50 CHF           | gmsmoorthy@yahoo.com                | 2022-10-19 | 2024-10-19 | All           | -                   | 2022-10-19 |
| 10b96db1441b50bc | Reviewer     | 50 CHF           | gmsmoorthy@yahoo.com                | 2023-03-10 | 2025-03-10 | All           | -                   | 2023-03-10 |

| Voucher code     | Voucher type | Voucher discount | Issued for           | Valid from | Valid to   | Valid journal | Valid special issue | Granted at |
|------------------|--------------|------------------|----------------------|------------|------------|---------------|---------------------|------------|
|                  |              |                  |                      |            |            |               |                     |            |
| 3b51aa634bcf902b | Reviewer     | 50 CHF           | gmsmoorthy@yahoo.com | 2023-03-16 | 2025-03-16 | All           | -                   | 2023-03-16 |
| 66ef79f04615ad5e | Reviewer     | 100 CHF          | gmsmoorthy@yahoo.com | 2023-04-11 | 2025-04-11 | All           | -                   | 2023-04-11 |

The total amount of the highlighted vouchers is 1100 CHF.
