# Supplementary material for: Initial Coefficients Bounds for Bi-univalent Functions Related to Gregory Coefficients
Source: Preprints.org preprint supplement (doi:10.20944/preprints202305.2115.v1), 2023-05-30
Supplement: Supplementary file 2 [file supplementary]

10 voucher(s) found

| Voucher code     | Voucher type | Voucher discount | Issued for                  |            | Valid from | Valid to   | Valid journal | Valid special issue | Granted at |
|------------------|--------------|------------------|-----------------------------|------------|------------|------------|---------------|---------------------|------------|
| 9c1f427b640bf486 | Reviewer     | 100 CHF          | bulboaca@math.ubbcluj.ro    |            | 2022-04-07 | 2024-04-07 | All           | -                   | 2022-04-07 |
| 22ca79d1f4c83b24 | Reviewer     | 100 CHF          | bulboaca@math.ubbcluj.ro    |            | 2022-09-13 | 2024-09-13 | All           | -                   | 2022-09-13 |
| 5616a0bdf4f02c27 | Reviewer     | 100 CHF          | bulboaca@math.ubbcluj.ro    |            | 2022-10-12 | 2024-10-12 | All           | -                   | 2022-10-12 |
| 72572a545ea64cd9 | Reviewer     | 100 CHF          | bulboaca@math.ubbcluj.ro    |            | 2022-10-31 | 2024-10-31 | All           | -                   | 2022-10-31 |
| 8611789646bd0df0 | Reviewer     | 100 CHF          | bulboaca@math.ubbcluj.ro    |            | 2022-11-10 | 2024-11-10 | All           | -                   | 2022-11-10 |
| 02debb55ea562b19 | Reviewer     | 100 CHF          | bulboaca@math.ubbcluj.ro    |            | 2022-12-20 | 2024-12-20 | All           | -                   | 2022-12-20 |
| f1da257578d8f635 | Reviewer     | 100 CHF          | teodor_bulboaca@hotmail.com | Associated | 2022-04-01 | 2024-04-01 | All           | -                   | 2022-04-01 |
| 796dd8675b0307ed | Reviewer     | 100 CHF          | teodor_bulboaca@hotmail.com | Associated | 2022-07-06 | 2024-07-06 | All           | -                   | 2022-07-06 |
| 8a11164631b78f6a | Reviewer     | 100 CHF          | teodor_bulboaca@hotmail.com | Associated | 2022-07-27 | 2024-07-27 | All           | -                   | 2022-07-27 |
| e8132c1e0f0b0287 | Reviewer     | 100 CHF          | teodor_bulboaca@hotmail.com | Associated | 2023-02-05 | 2025-02-05 | All           | -                   | 2023-02-05 |
